# Supplementary material
Source: PubMed Central journal article supplement (PMC4741277)
Supplement: ac5b04707_si_001.pdf [file ac5b04707_si_001.pdf]

# **A microfluidic device with integrated sonication and immunoprecipitation for sensitive epigenetic assays**

Zhenning Cao<sup>†</sup> and Chang Lu<sup>¶,\*</sup>

<sup>†</sup> Department of Biomedical Engineering and Mechanics, Virginia Tech, Blacksburg, VA 24061, USA

<sup>¶</sup> Department of Chemical Engineering, Virginia Tech, Blacksburg, VA 24061, USA

**Supporting Information:** Table S1-S2 and Video S1-S4

**Table S1. Primer sequences used in ChIP-qPCR.**

| <b>GM12878 and H3K4me3</b> |   |                        |
|----------------------------|---|------------------------|
| C9orf3                     | F | CCTCCTCAGTTCTCCCAGACT  |
|                            | R | AGCTGAGGTGGTAAGATGTGAC |
| UNKL                       | F | CAGCCACCCACCTAGGAA     |
|                            | R | TCCTATGGCTCCCCAGGT     |
| N1                         | F | TCATCTGCAAATGGGGACAA   |
|                            | R | AGGACACCCCCTCTCAACAC   |
| N2                         | F | ATGGTTGCCACTGGGGATCT   |
|                            | R | TGCCAAAGCCTAGGGGAAGA   |

**Table S2. Primer sequences used in MeDIP-qPCR.**

| <b>gDNA of GM12878 and 5-mC</b> |   |                         |
|---------------------------------|---|-------------------------|
| SNRPN                           | F | CGCTCAACACCCCCTAAATA    |
|                                 | R | GGTGGAGGTGGGTACATCAG    |
| MAGEA1                          | F | GTTCCCGCCAGGAAACATC     |
|                                 | R | GAACTCTACGCCGTCCCTCAG   |
| GABRB3                          | F | CCTGCAACTTTACTGAATTTAGC |
|                                 | R | GGAATCTCACTTTCACCACTGG  |
| GAPDH                           | F | CGTAGCTCAGGCCTCAAGAC    |
|                                 | R | GCTGCGGGCTCAATTTATAG    |

**Supplementary Videos**

**Video S1:** Cavitation at the edge of a microfluidic chamber without crescent structures. Sine-wave AC with  $V_{\text{peak}}$  of 20 V and 61 kHz was applied. The video was captured and played at a frame rate of 8 fps.

**Video S2:** Cavitation in a microfluidic chamber containing multiple crescent shapes.  $V_{\text{peak}}$  was gradually increased from 10 to 25 V. Sine-wave at 61 kHz was applied. The video was captured at a frame rate of 8 fps and is played at 20 fps.

**Video S3:** Acoustic streaming around a crescent shape. Sine-wave of 61 kHz and  $V_{\text{peak}}$  of 10 V was applied. 10X objective was used. The video was captured and played at a frame rate of 8 fps.

**Video S4:** A close look of acoustic streaming around the tip of a crescent shape. Sine-wave of 61 kHz and  $V_{\text{peak}}$  of 10 V was applied. 20X objective was used. The video was captured and played at a frame rate of 8 fps.
